# Supplementary material for: Robust, conformal Cu2O coatings on polypropylene fabrics via atmospheric-pressure spatial atomic layer deposition
Source: Royal Society of Chemistry journal article supplement (doi:10.1039/d6na00121a), 2026-05-01
Supplement: d6na00121a1.pdf [file d6na00121a1.pdf]

## Supporting Information

### Robust, Conformal $\text{Cu}_2\text{O}$ Coatings on Polypropylene Fabrics via Atmospheric-Pressure Spatial Atomic Layer Deposition

*Guvanch Gurbandurdyev, Sarah Khalid, Samantha Lum, Fan Ye, Autumn Cheon, Kam Chiu Tam, Stephanie DeWitte-Orr, and Kevin P. Musselman\**

\*Corresponding author: kevin.musselman@uwaterloo.ca

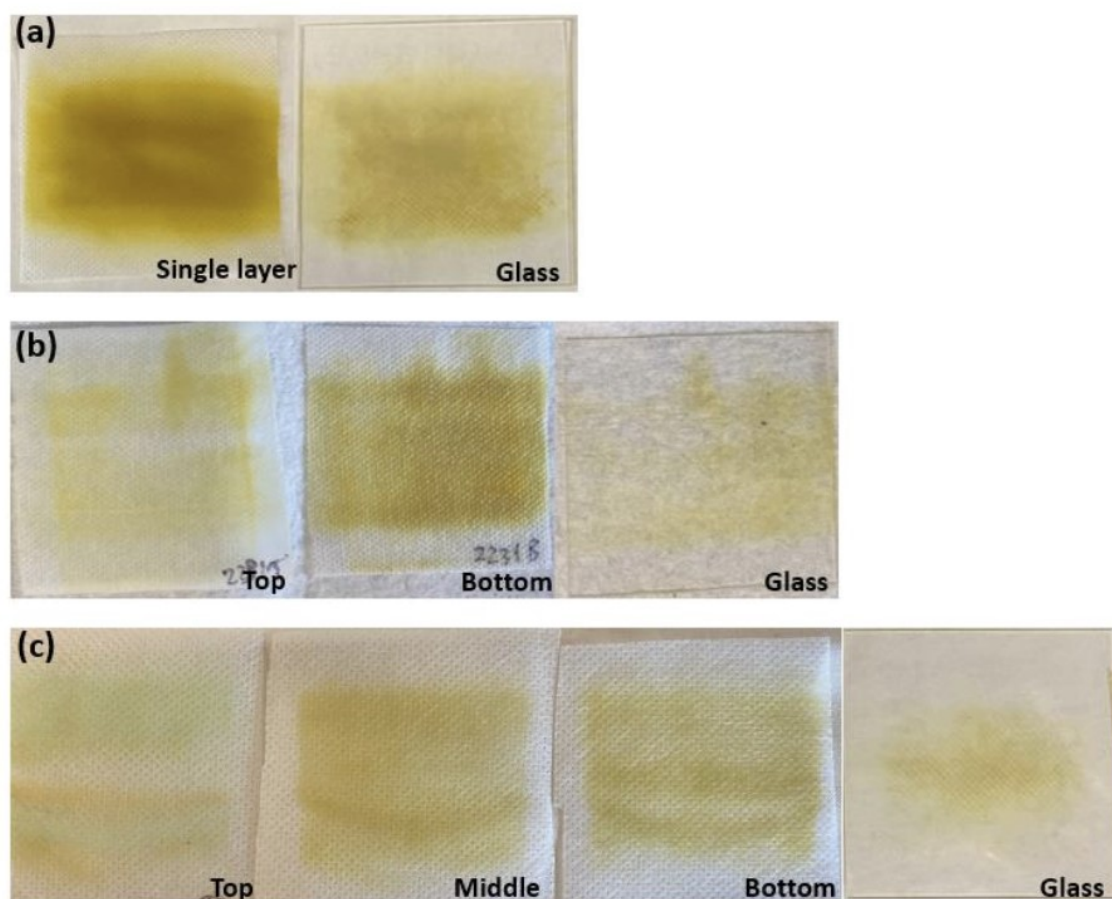

**Figure S1.** Coating of (a) one layer, (b) two layers, and (c) three layers of PP fabric on glass (7 cm x 7cm) with  $\text{Cu}_2\text{O}$ .

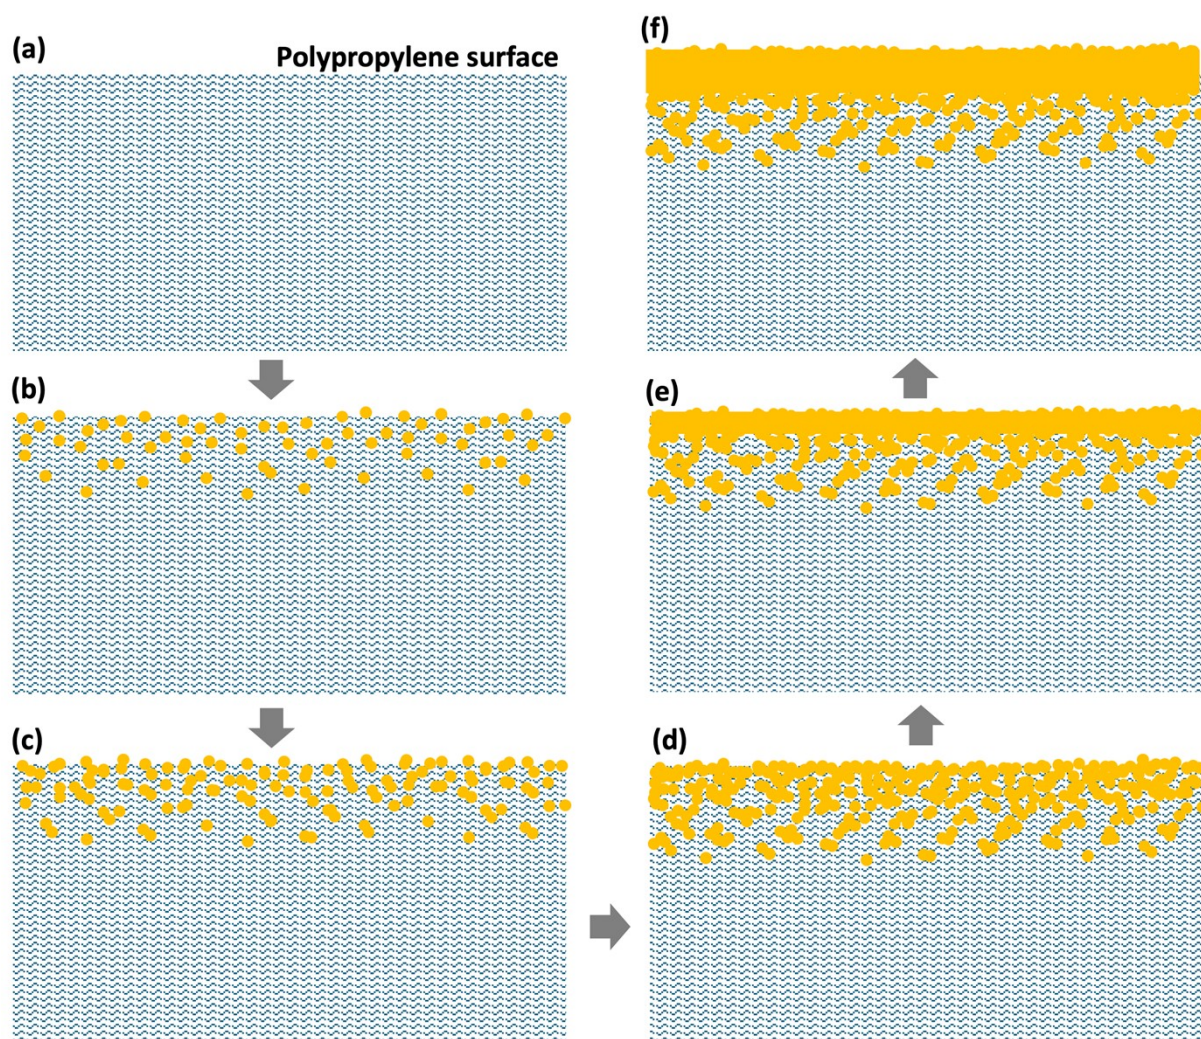

**Figure S2.** Illustration of subsurface infiltration process. (a) Surface of polypropylene fiber. (b) The chemical precursors, Cupraselect and water, get trapped in the near-surface region, forming  $\text{Cu}_2\text{O}$  nucleation clusters. (c-d) The  $\text{Cu}_2\text{O}$  clusters coalesce into larger clusters that fill the space between the polymer chains. (e-f) Cluster coalescence results in the formation of a continuous  $\text{Cu}_2\text{O}$  film that grows on the polypropylene surface.

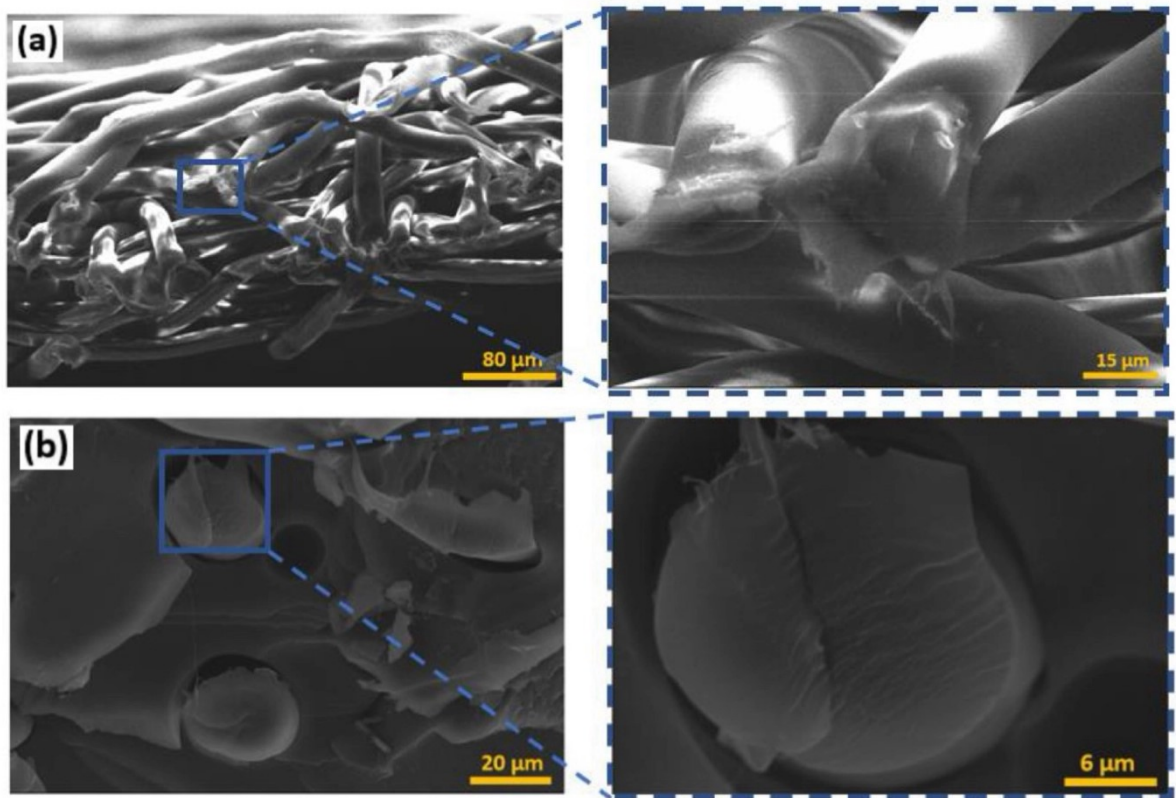

**Figure S3.** Cross-section SEM image of  $\text{Cu}_2\text{O}$ -coated PP fabric (600 AP-SALD oscillations) (a) after immersed in liquid nitrogen, and (b) after encapsulated with epoxy.

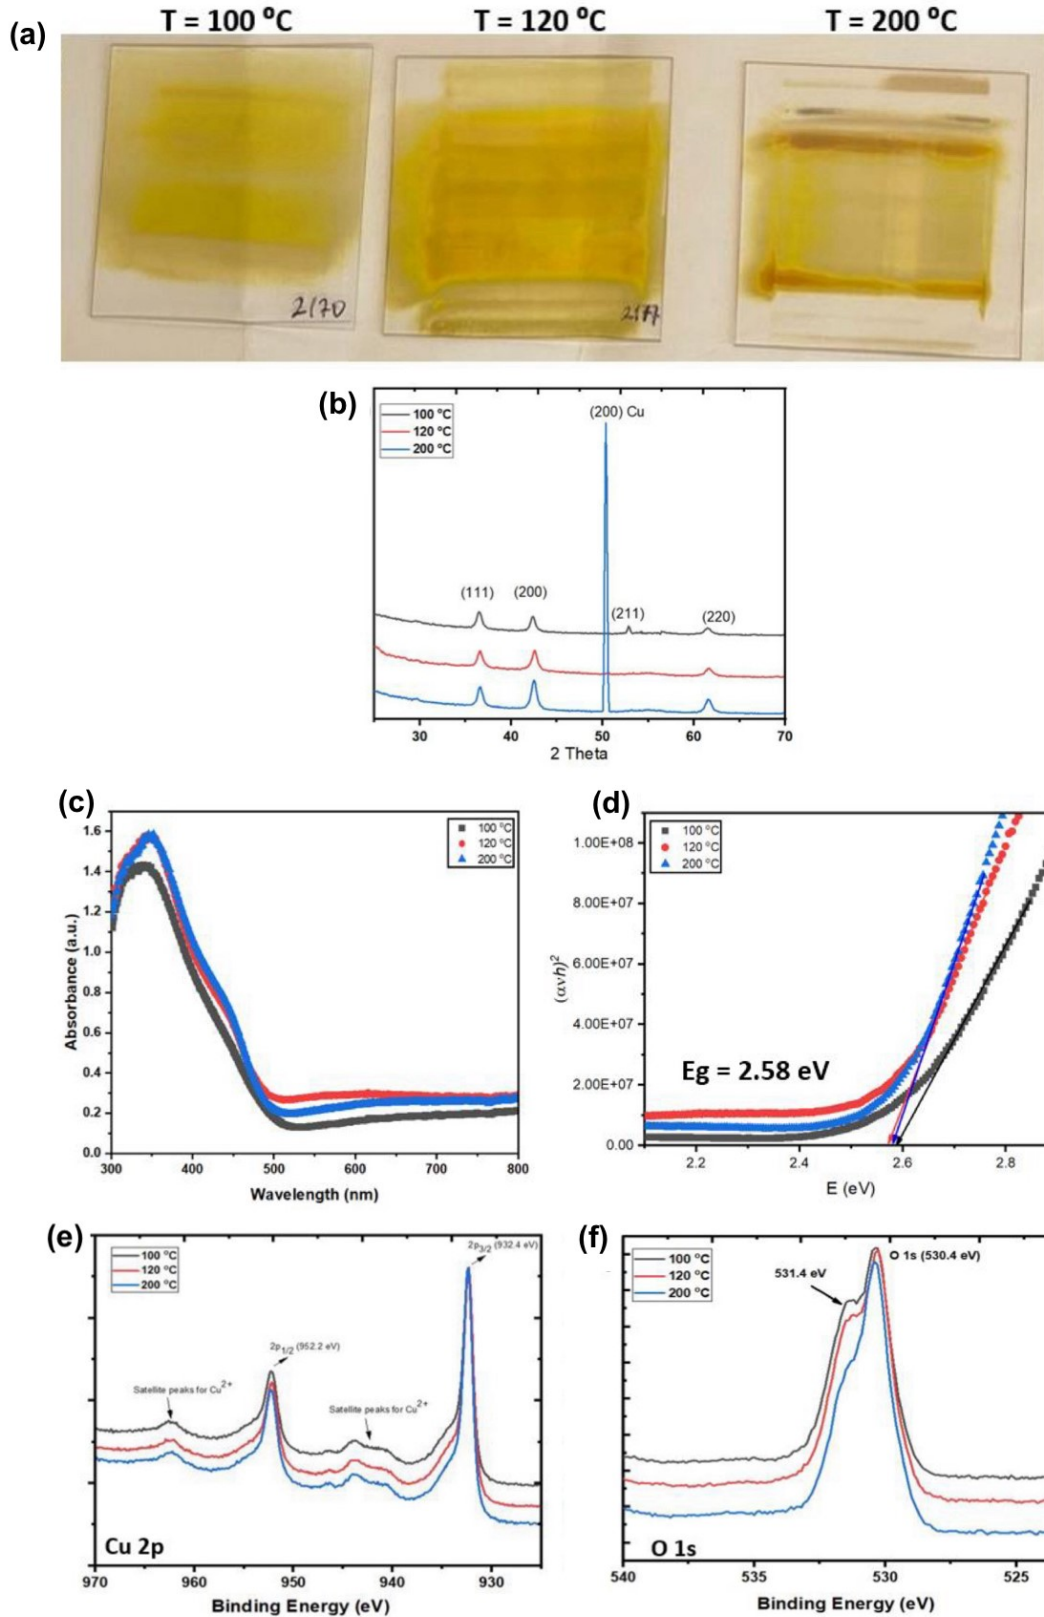

**Figure S4.** (a) The  $\text{Cu}_2\text{O}$  thin-film coatings deposited at 100 °C, 120 °C, and 200 °C, (b) their XRD patterns, (c) UV-Vis absorbance spectra, and (d) corresponding Tauc plots with calculated optical band gap energy value ( $E_g$ ). XPS measurement of  $\text{Cu}_2\text{O}$  samples showing (e) Cu 2p and (f) O 1s spectra.
